# Supplementary material for: A dual-mode highly selective and sensitive Schiff base chemosensor for fluorescent colorimetric detection of Ni2+ and colorimetric detection of Cu2+
Source: Royal Society of Chemistry journal article supplement (doi:10.1039/c9pp00114j), 2019-04-01
Supplement: c9pp00114j1.pdf [file c9pp00114j1.pdf]

## Supporting information

# Dual-mode highly selective and sensitive Schiff base chemosensor for fluorescent colorimetric detection of Ni<sup>2+</sup> and colorimetric detection of Cu<sup>2+</sup>

Amit Kumar Manna,<sup>a</sup>KalyaniRout,<sup>a</sup>ShubhamoyChowdhury<sup>b</sup> and Goutam K. Patra<sup>a\*</sup>

<sup>a</sup>Department of Chemistry, Guru Ghasidas Vishwavidyalaya, Bilaspur (C.G), India

<sup>b</sup>Department of Chemistry, GourBanga University, Malda, West Bengal 732 103, India

| Sl.No. | Content                                                                                                                                                                      | Figure No.      |
|--------|------------------------------------------------------------------------------------------------------------------------------------------------------------------------------|-----------------|
| 1.     | Mass spectra of <b>L</b>                                                                                                                                                     | <b>S1</b>       |
| 2.     | FT-IR spectra of <b>L</b>                                                                                                                                                    | <b>S2</b>       |
| 3.     | <sup>1</sup> H-NMR spectra of <b>L</b> in DMSO-d <sub>6</sub>                                                                                                                | <b>S3</b>       |
| 4.     | Job's plot of <b>L</b> with Cu <sup>2+</sup> and Ni <sup>2+</sup>                                                                                                            | <b>S4</b>       |
| 5.     | ESI-mass spectra of <b>L</b> -Cu <sup>2+</sup>                                                                                                                               | <b>S5</b>       |
| 6.     | ESI-mass spectra of <b>L</b> -Cu <sup>2+</sup>                                                                                                                               | <b>S6</b>       |
| 7.     | Association constants of (a) <b>L</b> -Cu <sup>2+</sup> and (b) <b>L</b> -Ni <sup>2+</sup>                                                                                   | <b>S7</b>       |
| 8.     | Absorption spectra of Ni <sup>2+</sup> in presence of Cu <sup>2+</sup> and Cys                                                                                               | <b>S8</b>       |
| 9.     | Fluorometric Detection limit of <b>L</b> in presence of Ni <sup>2+</sup>                                                                                                     | <b>S9</b>       |
| 10.    | IR spectra of <b>L</b> -Cu <sup>2+</sup> complex                                                                                                                             | <b>S10</b>      |
| 11.    | Partial <sup>1</sup> H NMR Spectra of <b>L</b> and <b>L</b> + Ni <sup>2+</sup> (2 equiv.)                                                                                    | <b>S11</b>      |
| 12.    | IR Spectra of <b>L</b> and <b>L</b> + Ni <sup>2+</sup> in solid phase                                                                                                        | <b>S12</b>      |
| 13.    | Geometry obtained from crystal structure of the four stable conformers for <b>L</b> .                                                                                        | <b>S13</b>      |
| 14.    | Selected HOMOs and LUMOs of <b>1</b> are shown. Positive values of the orbital contours are represented in yellow (0.03 au) and negative values in blue (-0.03 au).          | <b>S14</b>      |
| 15.    | Selected HOMOs and LUMOs of <b>2</b> <sup>+</sup> . Positive values of the orbital contour are represented in yellow (0.04 au) and negative values in blue (-0.03 au).       | <b>S15</b>      |
| 16.    | Crystallographically isolated conformational energies for <b>L</b> calculated at the level of DFT and their differences.                                                     | <b>Table S1</b> |
| 17.    | Selected experimental and optimized bond lengths (Å) and angles (°) of <b>L</b> and <b>1</b> are listed.                                                                     | <b>Table S2</b> |
| 18.    | Selected optimized bond lengths (Å) and angles (°) of <b>2</b> is listed                                                                                                     | <b>Table S3</b> |
| 19.    | The diagnostic experimental and calculated IR frequencies are shown for <b>L</b> , <b>1</b> and <b>2</b>                                                                     | <b>Table S4</b> |
| 20.    | Electronic transitions of <b>L</b> and <b>1</b> calculated in methanol using the TD-DFT method. The corresponding assignment is also given. Due to the open-shell electronic | <b>Table S5</b> |

|     |                                                                                                                                                                                                                                                                               |                 |
|-----|-------------------------------------------------------------------------------------------------------------------------------------------------------------------------------------------------------------------------------------------------------------------------------|-----------------|
|     | configuration of the <b>1</b> , the assignment distinguishes between $\alpha$ and $\beta$ molecular orbitals                                                                                                                                                                  |                 |
| 20. | Electronic transitions of <b>L</b> , <b>1</b> and <b>2</b> calculated in water using the TD-DFT method. Due to the open-shell electronic configuration of the <b>L</b> , <b>1</b> and <b>2</b> , the assignment distinguishes between $\alpha$ and $\beta$ molecular orbitals | <b>Table S6</b> |

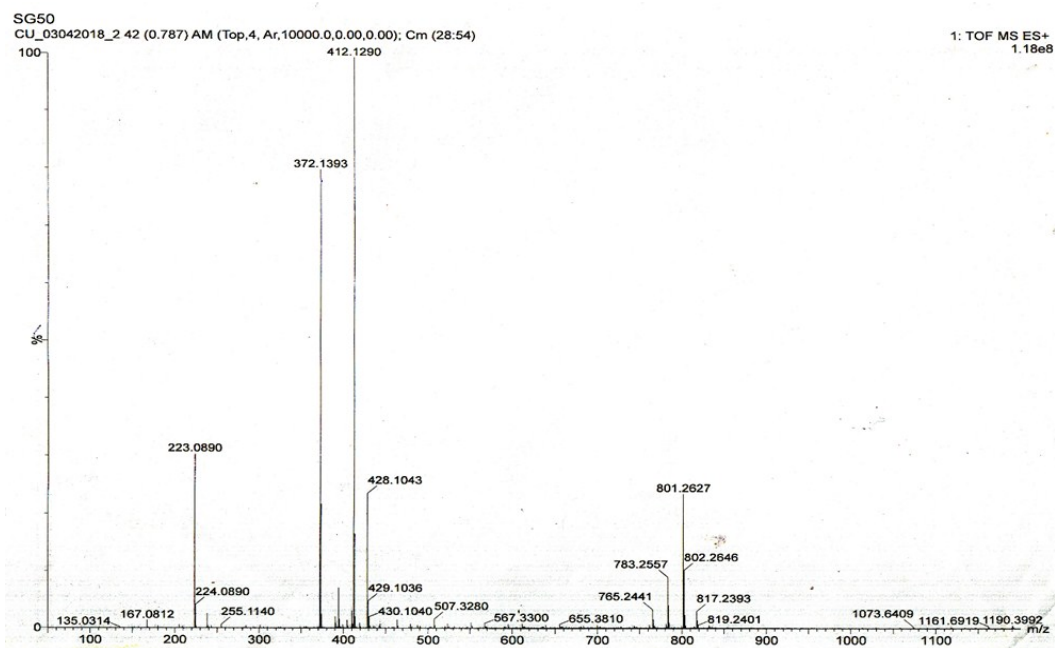

**Fig. S1.** ESI-mass spectra of **L**.

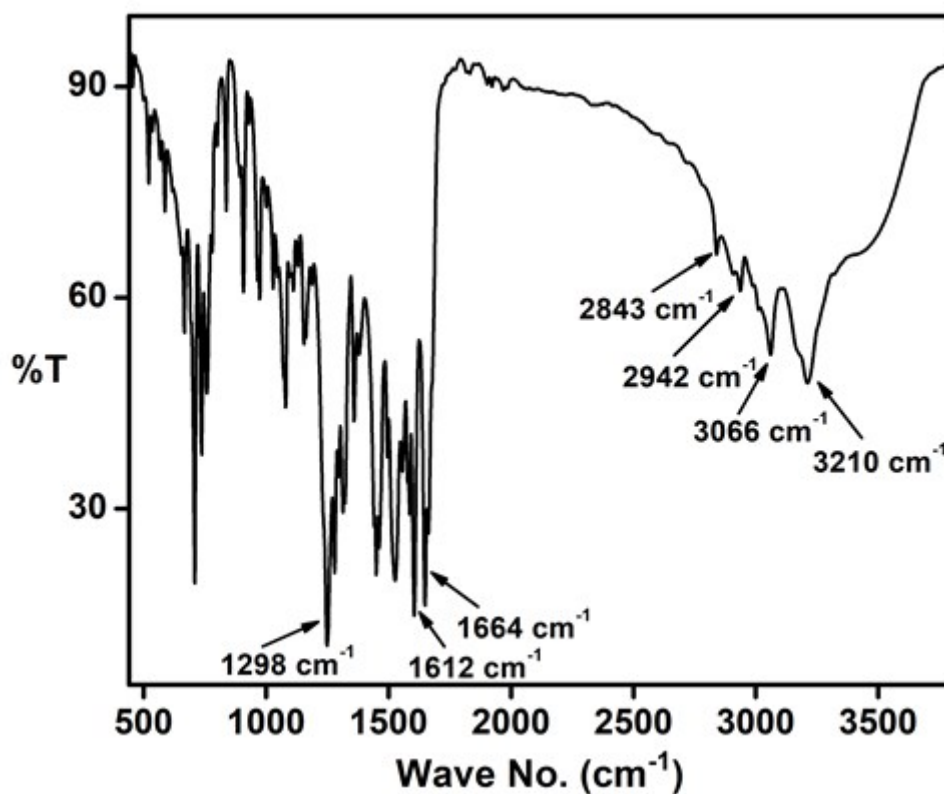

Fig. S2. FTIR spectra of L

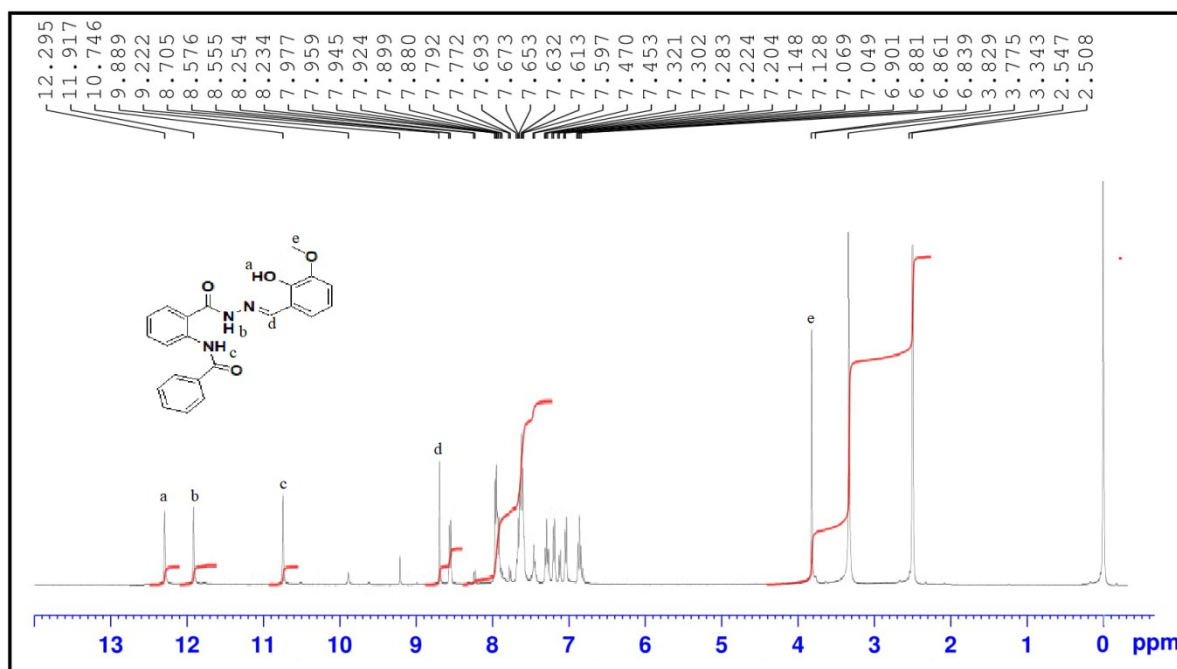

Fig. S3. <sup>1</sup>H NMR spectra of L in DMSO-d<sub>6</sub>

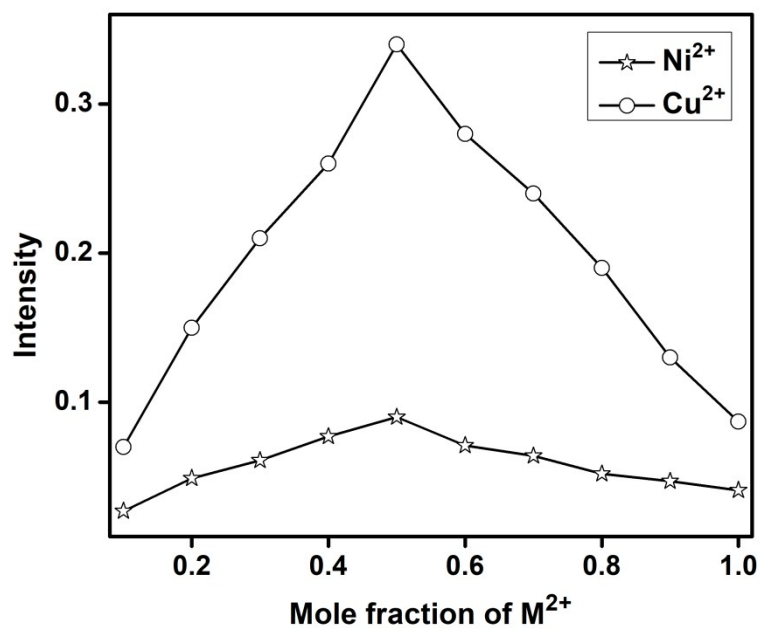

**Fig. S4.** Jobs plot of L- $Cu^{2+}$  and L- $Ni^{2+}$  complex formation

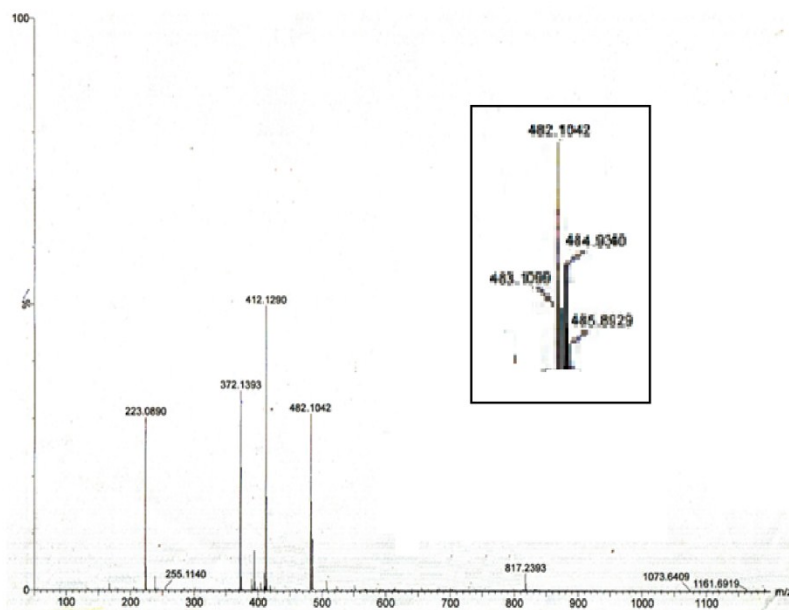

**Fig. S5.** ESI mass spectra of L- $Cu^{2+}$  complex

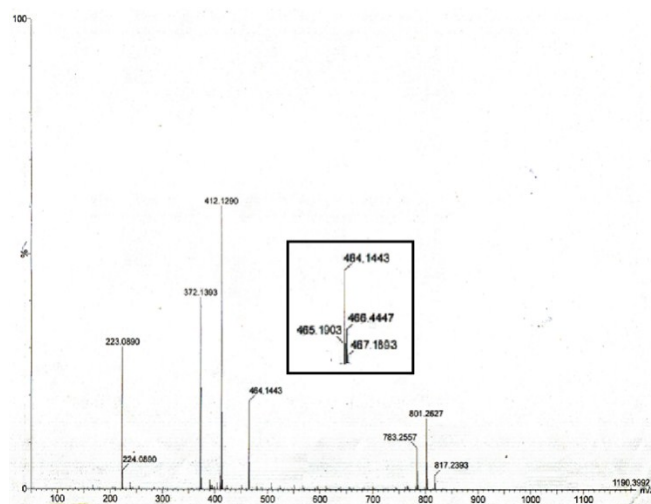

Fig. S6. ESI mass spectra of L-Ni<sup>2+</sup> complex

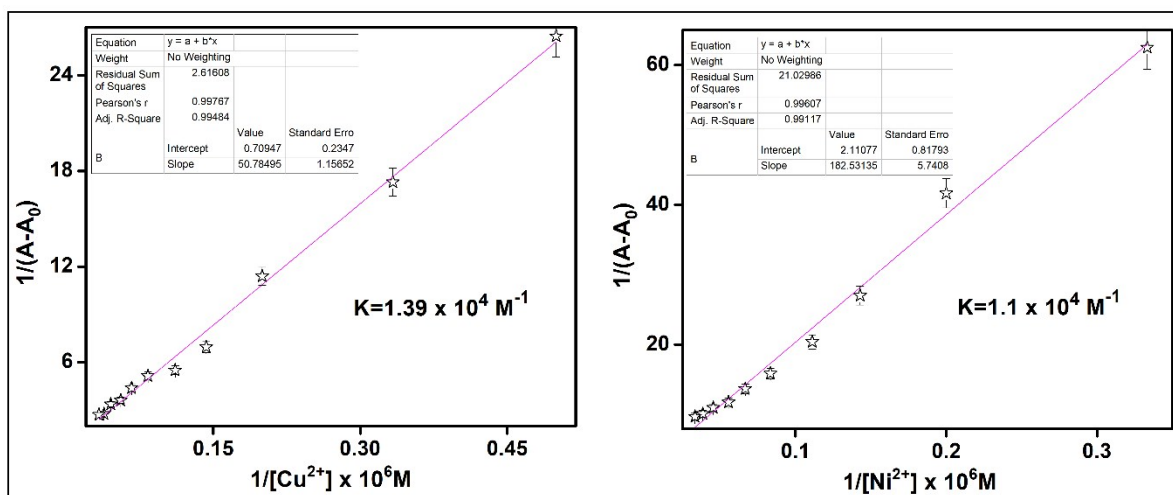

Fig. S7. Association constants of (a) L-Cu<sup>2+</sup> and (b) L-Ni<sup>2+</sup> complexes.

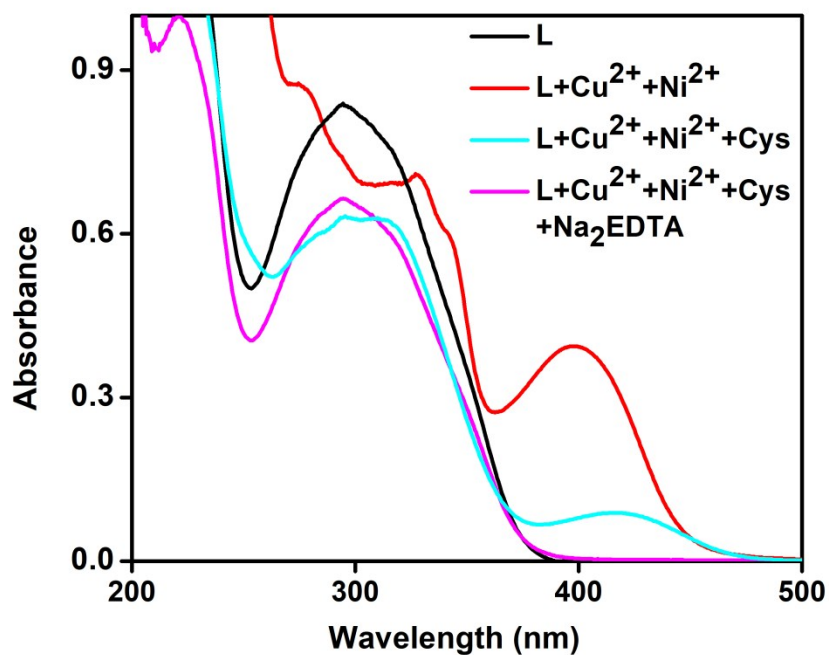

Fig. S8. Absorption spectra of Ni<sup>2+</sup> in presence of Cu<sup>2+</sup> and Cys.

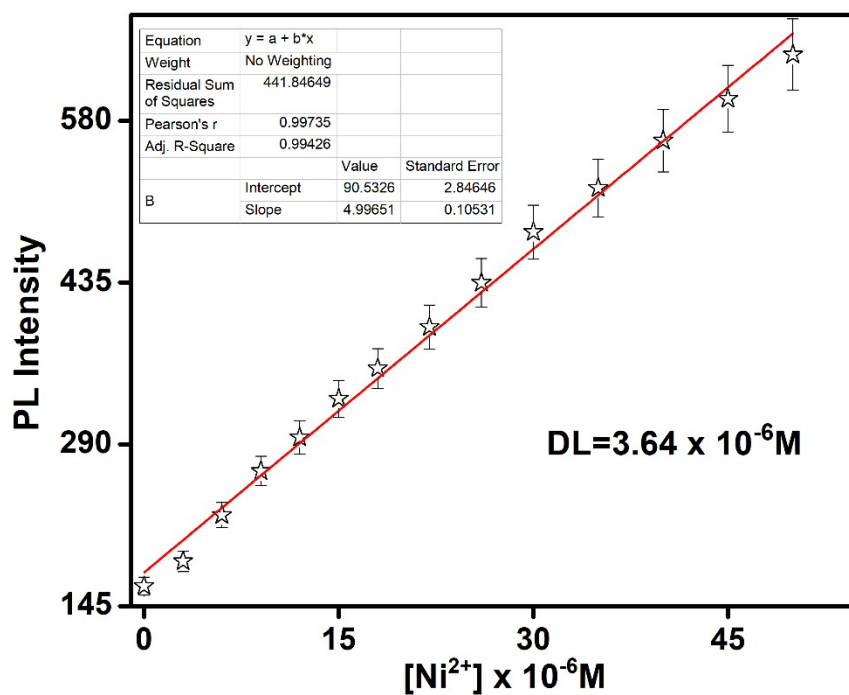

Fig. S9. Fluorometric Detection limit of L in presence of Ni<sup>2+</sup>

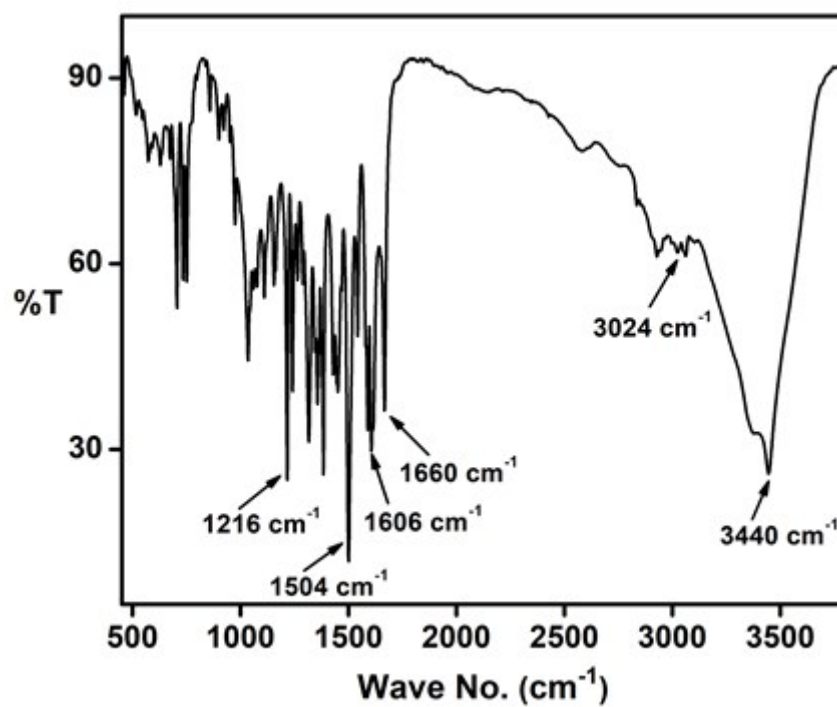

Fig. S10. IR spectra of L-Cu<sup>2+</sup> complex

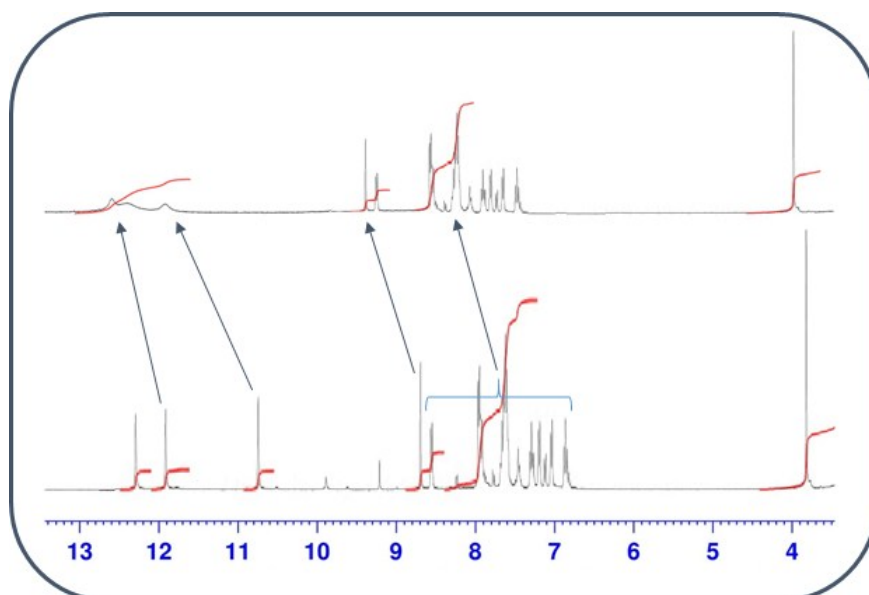

Fig. S11. Partial <sup>1</sup>H NMR Spectra of L and L+ Ni<sup>2+</sup> (2 equiv.)

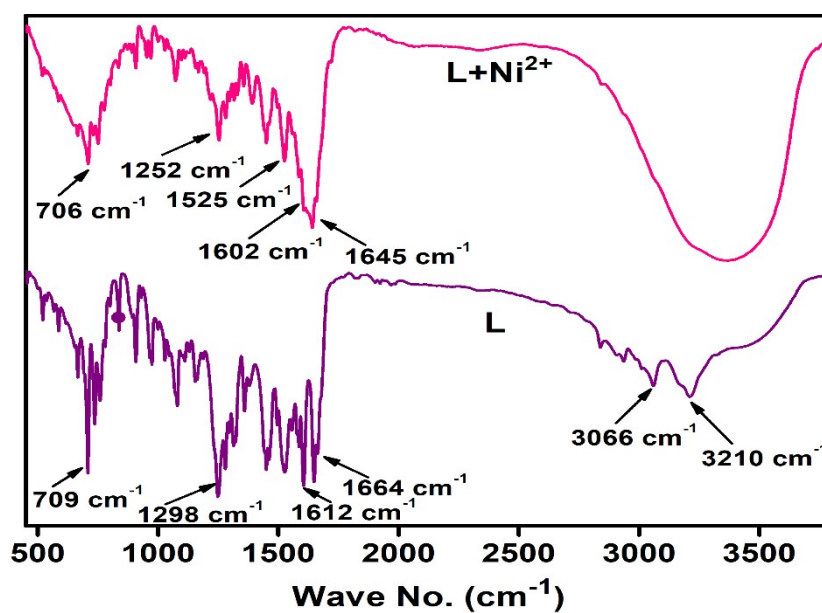

Fig. S12. IR Spectra of L and L+ Ni<sup>2+</sup> in solid phase

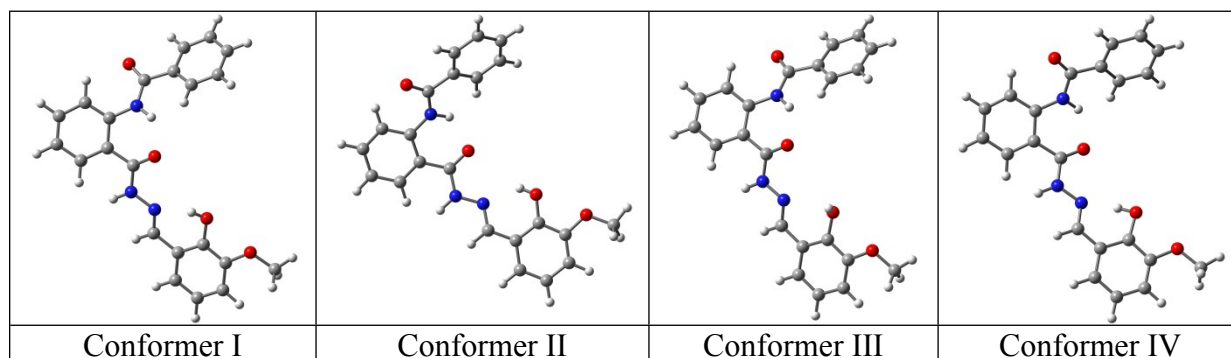

Fig. S13. Geometry obtained from crystal structure of the four stable conformers for L.

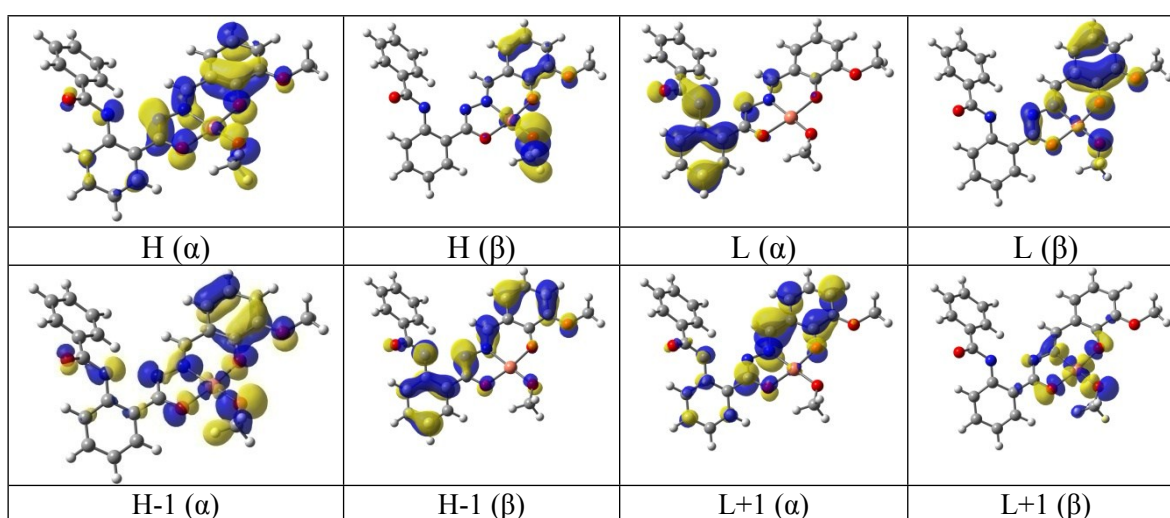



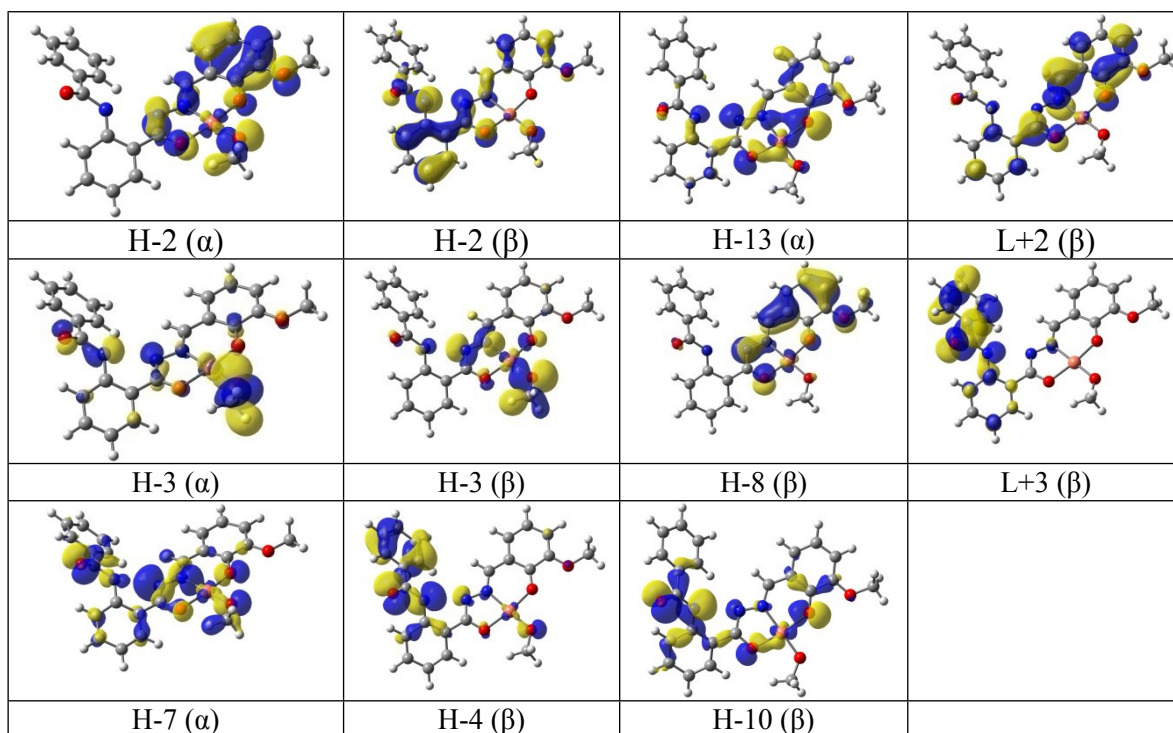

**Fig. S14.** Selected HOMOs and LUMOs of **1** are shown. Positive values of the orbital contours are represented in yellow (0.03 au) and negative values in blue (−0.03 au).

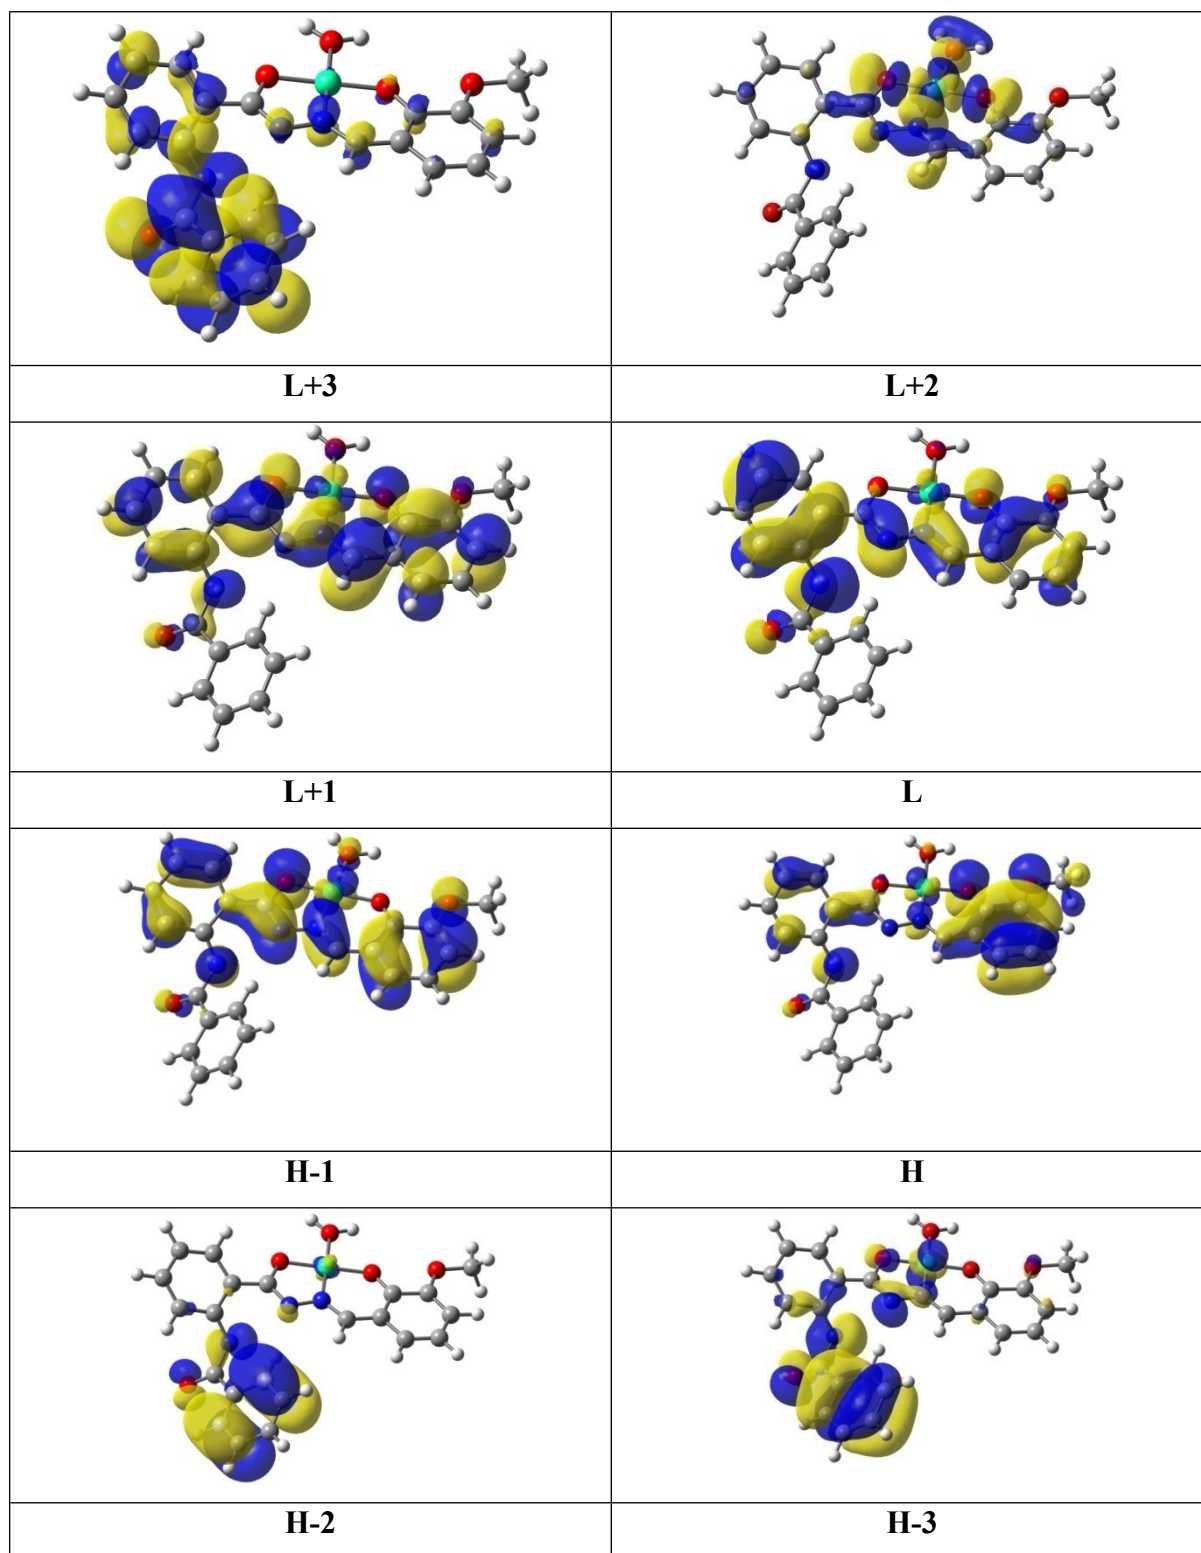

**Fig. S15.** Selected HOMOs and LUMOs of  $2^+$ . Positive values of the orbital contour are represented in yellow (0.04 au) and negative values in blue (-0.03 au).

**Table S1** Crystallographically isolated conformational energies for **L** calculated at the level of DFT and their differences.

| <b>L</b>      | <i>E</i> (Hartree) | $\Delta E$ (kJ/mol) |
|---------------|--------------------|---------------------|
| Conformer I   | -1314.9432216      | 43.95               |
| Conformer II  | -1314.9599612      | 0.0                 |
| Conformer III | -1314.9286518      | 82.02               |
| Conformer IV  | -1314.9588617      | 2.89                |

**Table S2** Selected experimental and optimized bond lengths (Å) and angles (°) of **L** and **1** are listed.

| <b>L</b>            |              |           |           |           |           | <b>1</b>     |           |           |
|---------------------|--------------|-----------|-----------|-----------|-----------|--------------|-----------|-----------|
| Bond lengths/angles | Experimental |           |           |           | Optimized | Bond lengths | Exp.      | Optimized |
|                     | Unit 1       | Unit 2    | Unit 3    | Unit 4    |           |              |           |           |
| O4-C3               | 1.356(12)    | 1.370(12) | 1.385(12) | 1.349(12) | 1.378     | Cu1-O2       | 1.876(6)  | 1.98593   |
| C3-C5               | 1.391(14)    | 1.387(15) | 1.401(14) | 1.406(14) | 1.390     | Cu1-N6       | 1.872(8)  | 1.98726   |
| C5-C6               | 1.480(14)    | 1.416(15) | 1.451(14) | 1.397(15) | 1.454     | Cu1-O9       | 1.920(6)  | 1.97497   |
| C6-N7               | 1.257(14)    | 1.319(12) | 1.294(12) | 1.301(14) | 1.284     | Cu1-O31      | 1.940(7)  | 1.86293   |
| N7-N8               | 1.396(12)    | 1.375(12) | 1.375(11) | 1.379(11) | 1.386     | O2-C3        | 1.322(11) | 1.30164   |
| N8-C9               | 1.347(12)    | 1.365(12) | 1.347(12) | 1.385(12) | 1.343     | C4-C5        | 1.445(13) | 1.43434   |
| C9-O10              | 1.229(13)    | 1.234(13) | 1.251(12) | 1.217(12) | 1.245     | C5-N6        | 1.298(12) | 1.32527   |
| C2-O1               | 1.392(12)    | 1.384(13) | 1.371(13) | 1.376(13) | 1.370     | N6-N7        | 1.413(10) | 1.39426   |
| N13-C14             | 1.359(13)    | 1.344(14) | 1.357(13) | 1.357(13) | 1.360     | N7-C8        | 1.322(12) | 1.35562   |
| C14-O15             | 1.231(13)    | 1.249(14) | 1.222(13) | 1.222(13) | 1.229     | C8-O9        | 1.293(12) | 1.32540   |
| O1-C2-C3            | 114.7(9)     | 113.5(9)  | 116.6(9)  | 113.9(9)  | 116.48    | O31-C32      | 1.437(12) | 1.43585   |
| C2-C3-O4            | 119.7(9)     | 119.0(9)  | 117.1(9)  | 118.5(9)  | 117.27    | O29-C30      | 1.437(12) | 1.45958   |
| C3-C5-C6            | 122.1(9)     | 122.5(9)  | 122.4(9)  | 122.1(10) | 122.11    | O2-Cu1-N6    | 93.8(3)   | 89.93008  |
| C5-C6-N7            | 119.5(9)     | 120.6(10) | 119.9(9)  | 121.5(10) | 119.94    | N6-Cu1-O9    | 82.6(3)   | 80.14024  |
| C6-N7-N8            | 117.2(9)     | 115.9(8)  | 115.9(8)  | 116.6(8)  | 116.34    | O9-Cu1-O31   | 95.0(3)   | 99.13916  |
| N7-N8-C9            | 117.5(8)     | 117.2(8)  | 117.2(8)  | 117.3(8)  | 117.17    | O2-Cu1-O31   | 88.5(3)   | 90.90838  |
| N8-C9-O10           | 122.7(9)     | 122.7(10) | 122.4(9)  | 121.8(9)  | 122.65    | O2-C3-C4     | 125.4(8)  | 123.79976 |
| O10-C9-C11          | 123.8(9)     | 123.4(9)  | 122.1(9)  | 125.5(9)  | 122.60    | C4-C5-N6     | 121.5(8)  | 125.37299 |
| C9-C11-C12          | 120.2(9)     | 120.2(9)  | 121.2(9)  | 119.3(9)  | 120.88    | C5-N6-N7     | 115.6(7)  | 116.34041 |
| C11-C12-N13         | 117.3(9)     | 117.7(9)  | 117.4(9)  | 116.5(9)  | 117.57    | N6-N7-C8     | 109.4(7)  | 109.82222 |
| C12-N13-C14         | 125.5(9)     | 127.8(9)  | 127.0(9)  | 125.5(9)  | 126.51    | N7-C8-O9     | 122.8(9)  | 122.56136 |

**Table S3** Selected optimized bond lengths (Å) and angles (°) of **2** is listed.

| Bondlengths | Optimized | Bond angles | Optimized |
|-------------|-----------|-------------|-----------|
| Ni1-O2      | 1.8312    | O2-Ni1-N6   | 95.927    |
| Ni1-N6      | 1.8442    | N6-Ni1-O9   | 84.467    |
| Ni1-O9      | 1.8605    | O9-Ni1-O31  | 94.228    |
| Ni1-O31     | 1.9044    | O31-Ni1-O2  | 85.377    |
| O2-C3       | 1.3166    | O2-C3-C4    | 123.170   |
| C3-C4       | 1.4572    | C3-C4-C5    | 121.656   |

|         |        |             |         |
|---------|--------|-------------|---------|
| C4-C5   | 1.4170 | C4-C5-N6    | 124.672 |
| C5-N6   | 1.3397 | N6-N7-C10   | 108.804 |
| N6-N7   | 1.3814 | N7-C8-O9    | 120.478 |
| N7-C8   | 1.3593 | N7-C8-C10   | 120.311 |
| C8-O9   | 1.3411 | C10-C11-N12 | 118.617 |
| N12-C13 | 1.4244 | N12-C13-O14 | 119.113 |
| C13-O14 | 1.2574 |             |         |

**Table S4** The diagnostic experimental and calculated IR frequencies are shown for **L, 1** and **2**

| Experimental (cm <sup>-1</sup> ) | Theoretical (cm <sup>-1</sup> )                                                                   | Assignments                                      |
|----------------------------------|---------------------------------------------------------------------------------------------------|--------------------------------------------------|
| <b>Ligand (L)</b>                |                                                                                                   |                                                  |
| 1675 s, 1664 vs                  | 1731.84, 1693.47                                                                                  | $\nu_{C=O}$ (amides)                             |
| 1649 vs                          | 1639.08                                                                                           | $\nu_{C=N}$ (imine bonds)                        |
| 2935 s, 3035 s, 3212 s           | 2996.49, 3065.88, 3105.75                                                                         | $\nu_{C-H}$ of -OCH <sub>3</sub>                 |
| 3435 br                          | 3593.26                                                                                           | $\nu_{O-H}$                                      |
| <b>1</b>                         |                                                                                                   |                                                  |
| 1616                             | 1610.30                                                                                           | $\nu_{C=N}$                                      |
| 1667                             | 1650.91                                                                                           | $\nu_{C=O}$ (coordinated amide)                  |
| 1589                             | 1547.91                                                                                           | $\nu_{C=O}$ (non coordinated amide)              |
| 3064 br, 3020 br, 2932 br        | 2980.39, 3048.70, 3095.14                                                                         | $\nu_{C-H}$ (Coordinated -OCH <sub>3</sub> )     |
| 3454 br, 3364 br                 | 3201.60, 3122.72                                                                                  | $\nu_{C-H}$ (Non Coordinated -OCH <sub>3</sub> ) |
| <b>2</b>                         |                                                                                                   |                                                  |
| 1610                             | 1630.51                                                                                           | $\nu_{C=N}$                                      |
| 1642                             | 1648.38                                                                                           | $\nu_{C=O}$ (coordinated amide)                  |
| 1586                             | 1583.80                                                                                           | $\nu_{C=O}$ (non coordinated amide)              |
| 1560                             | 1594.45                                                                                           | $\delta_{H-O-H}$ (Coordinated water) bending     |
| 3066, 3210 br                    | 3044.19, 3136.61, 3207.43                                                                         | $\nu_{C-H}$ (OCH <sub>3</sub> )                  |
| 3338 br                          | 3211.11, 3214.91, 3220.10, 3223.45, 3229.73, 3234.17, 3236.90, 3242.75, 3250.32, 3254.22, 3259.28 | $\nu_{O-H}$ , $\nu_{C-H}$ (Ar-H)                 |

|      |         |                                                       |
|------|---------|-------------------------------------------------------|
| 3742 | 3726.05 | $\nu_{\text{O-H}}$ ( Coordinated water)<br>symmetric  |
| 3853 | 3896.97 | $\nu_{\text{O-H}}$ ( Coordinated water)<br>asymmetric |

**Table S5.** Electronic transitions of **L** and **1** calculated in methanol using the TD-DFT method. The corresponding assignment is also given. Due to the open-shell electronic configuration of the **1**, the assignment distinguishes between  $\alpha$  and  $\beta$  molecular orbitals.

| Experimental                                                 | Calculated     |                            | Assignment                                                                                                    |
|--------------------------------------------------------------|----------------|----------------------------|---------------------------------------------------------------------------------------------------------------|
| $\lambda$ nm ( $\epsilon$ M <sup>-1</sup> cm <sup>-1</sup> ) | $\lambda$ (nm) | Oscillator strength (a.u.) | Most important orbital excitations                                                                            |
| <b>L</b>                                                     |                |                            |                                                                                                               |
| 294 (8150)                                                   | 325.68         | 0.1281                     | H→L, H-1→L                                                                                                    |
| 220 (11320)                                                  | 228.22         | 0.3983                     | H-4→L+1, H-16→L, H-10→L                                                                                       |
| <b>1</b>                                                     |                |                            |                                                                                                               |
| 390 (2350)                                                   | 485.60         | 0.0256                     | H → L ( $\beta$ ), H-3 → L+1 ( $\beta$ )                                                                      |
| 325 (4670)                                                   | 387.72         | 0.0136                     | H-1 → L ( $\alpha$ ), H → L ( $\alpha$ ), H-1 → L ( $\beta$ )                                                 |
| 277 (5830)                                                   | 376.04         | 0.0106                     | H → L+1 ( $\alpha$ ), H-1→L+2 ( $\beta$ ), H → L ( $\beta$ ), H-2 → L+1 ( $\beta$ )<br>H-2 → L+1 ( $\alpha$ ) |
| 250 (7580)                                                   | 286.61         | 0.0467                     | H-1 → L+1 ( $\alpha$ ), H → L+2( $\beta$ ), H-10 → L+1 ( $\beta$ )                                            |
| 230 (10750)                                                  | 235.61         | 0.0315                     | H-3 → L +1 ( $\alpha$ ), H-2 → L+2 ( $\beta$ ), H-4 → L+3 ( $\beta$ )                                         |
| 202 (19630)                                                  | 225.27         | 0.1148                     | H-8 → L+1 ( $\beta$ ), H-4 → L+3 ( $\beta$ ), H-13 → L ( $\alpha$ ),<br>H-7 → L+1 ( $\alpha$ )                |

**Table S6.** Electronic transitions of **L**, **1** and **2** calculated in water using the TD-DFT method. Due to the open-shell electronic configuration of the **L**, **1** and **2**, the assignment distinguishes between  $\alpha$  and  $\beta$  molecular orbitals

| Most important orbital excitations                                                                                                                                      | $\lambda$ | $f$    | Experimental $\lambda$ ( $\epsilon$ ) |
|-------------------------------------------------------------------------------------------------------------------------------------------------------------------------|-----------|--------|---------------------------------------|
| <b>HL</b>                                                                                                                                                               |           |        |                                       |
| H $\rightarrow$ L, H-1 $\rightarrow$ L                                                                                                                                  | 325.68    | 0.1281 | 294 (8150)                            |
| H-2 $\rightarrow$ L, H-3 $\rightarrow$ L                                                                                                                                | 304.64    | 0.0296 |                                       |
| H $\rightarrow$ L, H-1 $\rightarrow$ L, H-4 $\rightarrow$ L                                                                                                             | 290.60    | 0.0803 |                                       |
| H-2 $\rightarrow$ L+1, H-1 $\rightarrow$ L+1, H-1 $\rightarrow$ L                                                                                                       | 266.78    | 0.0310 |                                       |
| H-2 $\rightarrow$ L+1, H-1 $\rightarrow$ L+1, H-3 $\rightarrow$ L+1                                                                                                     | 259.74    | 0.0069 |                                       |
| H $\rightarrow$ L+3, H-2 $\rightarrow$ L+2, H-5 $\rightarrow$ L                                                                                                         | 239.22    | 0.0225 |                                       |
| H-4 $\rightarrow$ L+1, H-16 $\rightarrow$ L, H-10 $\rightarrow$ L                                                                                                       | 228.22    | 0.3983 | 220 (11320)                           |
| H $\rightarrow$ L+3, H-4 $\rightarrow$ L+1, H-6 $\rightarrow$ L+1                                                                                                       | 219.09    | 0.0966 |                                       |
| H-2 $\rightarrow$ L+2, H-16 $\rightarrow$ L, H-17 $\rightarrow$ L                                                                                                       | 214.16    | 0.0517 |                                       |
| H-2 $\rightarrow$ L+2, H-15 $\rightarrow$ L, H-16 $\rightarrow$ L                                                                                                       | 213.22    | 0.0063 |                                       |
| <b>1</b>                                                                                                                                                                |           |        |                                       |
| H $\rightarrow$ L ( $\beta$ ), H-3 $\rightarrow$ L+1 ( $\beta$ )                                                                                                        | 485.60    | 0.0256 | 390 (2425)                            |
| H $\rightarrow$ L ( $\alpha$ ), H-2 $\rightarrow$ L ( $\beta$ )                                                                                                         | 440.49    | 0.0187 |                                       |
| H-1 $\rightarrow$ L ( $\beta$ ), H-3 $\rightarrow$ L ( $\beta$ ), H $\rightarrow$ L+1( $\alpha$ )                                                                       | 425.18    | 0.0026 |                                       |
| H-3 $\rightarrow$ L ( $\alpha$ ), H-2 $\rightarrow$ L ( $\alpha$ ), H-1 $\rightarrow$ L+1( $\beta$ )                                                                    | 402.88    | 0.0037 |                                       |
| H-1 $\rightarrow$ L ( $\alpha$ ), H $\rightarrow$ L ( $\alpha$ ), H-1 $\rightarrow$ L ( $\beta$ )                                                                       | 387.72    | 0.0136 | 325 (4750)                            |
| H-2 $\rightarrow$ L ( $\alpha$ ), H-1 $\rightarrow$ L ( $\beta$ ), H-3 $\rightarrow$ L ( $\beta$ )                                                                      | 377.74    | 0.0011 |                                       |
| H $\rightarrow$ L+1 ( $\alpha$ ), H-1 $\rightarrow$ L+2 ( $\beta$ ), H $\rightarrow$ L ( $\beta$ ), H-2 $\rightarrow$ L+1 ( $\beta$ )H-2 $\rightarrow$ L+1 ( $\alpha$ ) | 376.04    | 0.0106 | 277 (5840)                            |
| H-4 $\rightarrow$ L ( $\beta$ ), H-3 $\rightarrow$ L ( $\beta$ ), H-2 $\rightarrow$ L ( $\alpha$ )                                                                      | 365.67    | 0.0045 |                                       |
| H-4 $\rightarrow$ L ( $\alpha$ ), H-6 $\rightarrow$ L ( $\alpha$ ), H $\rightarrow$ L+2 ( $\beta$ )                                                                     | 314.43    | 0.1161 |                                       |
| H-1 $\rightarrow$ L+1 ( $\beta$ ), H-2 $\rightarrow$ L+1 ( $\beta$ ), H-3 $\rightarrow$ L+1( $\alpha$ )                                                                 | 299.77    | 0.0398 |                                       |
| H-4 $\rightarrow$ L ( $\alpha$ ), H-3 $\rightarrow$ L ( $\alpha$ ), H-1 $\rightarrow$ L+1 ( $\beta$ )                                                                   | 296.07    | 0.0037 |                                       |
| H-3 $\rightarrow$ L ( $\alpha$ ), H-4 $\rightarrow$ L ( $\alpha$ ), H-1 $\rightarrow$ L+2 ( $\beta$ )                                                                   | 289.68    | 0.0232 |                                       |
| H-1 $\rightarrow$ L+1 ( $\alpha$ ), H $\rightarrow$ L+2( $\beta$ ), H-10 $\rightarrow$ L+1 ( $\beta$ )                                                                  | 286.61    | 0.0467 | 250 (7580)                            |
| H-4 $\rightarrow$ L ( $\alpha$ ), H-5 $\rightarrow$ L ( $\beta$ )                                                                                                       | 283.12    | 0.0252 |                                       |
| H $\rightarrow$ L+1 ( $\alpha$ ), H $\rightarrow$ L+2 ( $\alpha$ ), H-7 $\rightarrow$ L+1 ( $\beta$ )                                                                   | 276.20    | 0.0315 |                                       |
| H-5 $\rightarrow$ L ( $\alpha$ ), H-8 $\rightarrow$ L ( $\alpha$ ), H-9 $\rightarrow$ L ( $\beta$ )                                                                     | 269.91    | 0.0255 |                                       |
| H-2 $\rightarrow$ L+1 ( $\alpha$ ), H-1 $\rightarrow$ L+1 ( $\beta$ ), H-9 $\rightarrow$ L ( $\beta$ )                                                                  | 263.70    | 0.0342 |                                       |

|                                                              |           |        |             |
|--------------------------------------------------------------|-----------|--------|-------------|
| H-2→L+1 (β), H-1→L+1 (β), H-5→L+1 (α), H-8→L+1 (α)           | 259.06    | 0.0194 |             |
| H-6→L (α), H-9→L (α), H-11→L (β)                             | 246.80    | 0.0081 |             |
| H-8→L (α), H-6→L (β), H-9→L (β)                              | 242.89    | 0.0278 |             |
| H-3 → L +1 (α), H-2 → L+2 (β), H-4 → L+3 (β)                 | 235.61    | 0.0315 | 230 (10760) |
| H-8 → L+1 (β), H-4 → L+3 (β), H-13 → L (α),<br>H-7 → L+1 (α) | 225.27    | 0.1148 | 202 (20000) |
| H-8→L (β), H-7→L+1 (α), H-9→L (β)                            | 221.81    | 0.0660 |             |
| H-4→L+1 (α), H-3→L+1 (β), H-19→L (β)                         | 215.94    | 0.0376 |             |
| H-16→L (α), H-17→L+1 (α)                                     | 214.89    | 0.0390 |             |
| H-4→L+1 (β), H-3→L+1 (β), H-10→L+1 (α)                       | 207.99    | 0.0460 |             |
| H-4→L+1 (α), H-3→L+1 (α), H-17→L (β)                         | 205.32    | 0.0265 |             |
| <b>2</b>                                                     |           |        |             |
| H → L, H → L+3                                               | 306.98437 | 0.0091 |             |
| H-1→L+1, H-1→L +2                                            | 306.11282 | 0.1275 |             |
| H-1→L +1, H-1→L+2, H-7→L+2                                   | 300.67384 | 0.1145 | 294         |
| H-4→L+1, H-13→L                                              | 287.73969 | 0.0097 |             |
| H-3 → L+1, H-4 → L +1, H-5 → L+1                             | 285.17407 | 0.0054 |             |
| H-13→L +1, H-14→L+1, H-15→L                                  | 280.20198 | 0.0073 |             |
| H-14 → L, H-15→ L, H-16→ L                                   | 275.8884  | 0.0581 |             |
| H-1→L +3, H→L +4, H-15→L                                     | 267.70465 | 0.0448 |             |
| H-1→L+3, H-5→L+1, H-2→L+1, H→L+4                             | 265.66627 | 0.0592 |             |
| H→L+4, H-5→L+1, H-15→L                                       | 262.12991 | 0.0114 |             |
| H→L +4, H-15→L, H-16→L                                       | 256.14905 | 0.0879 |             |
| H-3→L +3, H-5→L+1, H-6→L+1                                   | 253.26601 | 0.0471 |             |
| H-2 → L+1, H → L+4, H-6 → L+1, H-15→ L                       | 250.60429 | 0.1384 | 220         |
| H-2→L +1, H-3→L +1, H-15→L                                   | 249.68153 | 0.0246 |             |
